# Supplementary material
Source: publisher figshare collection journal article supplement (https://frontiersin.figshare.com/ndownloader/files/12299846)
Supplement: Supplementary file [file 12299846]

# YYIE2

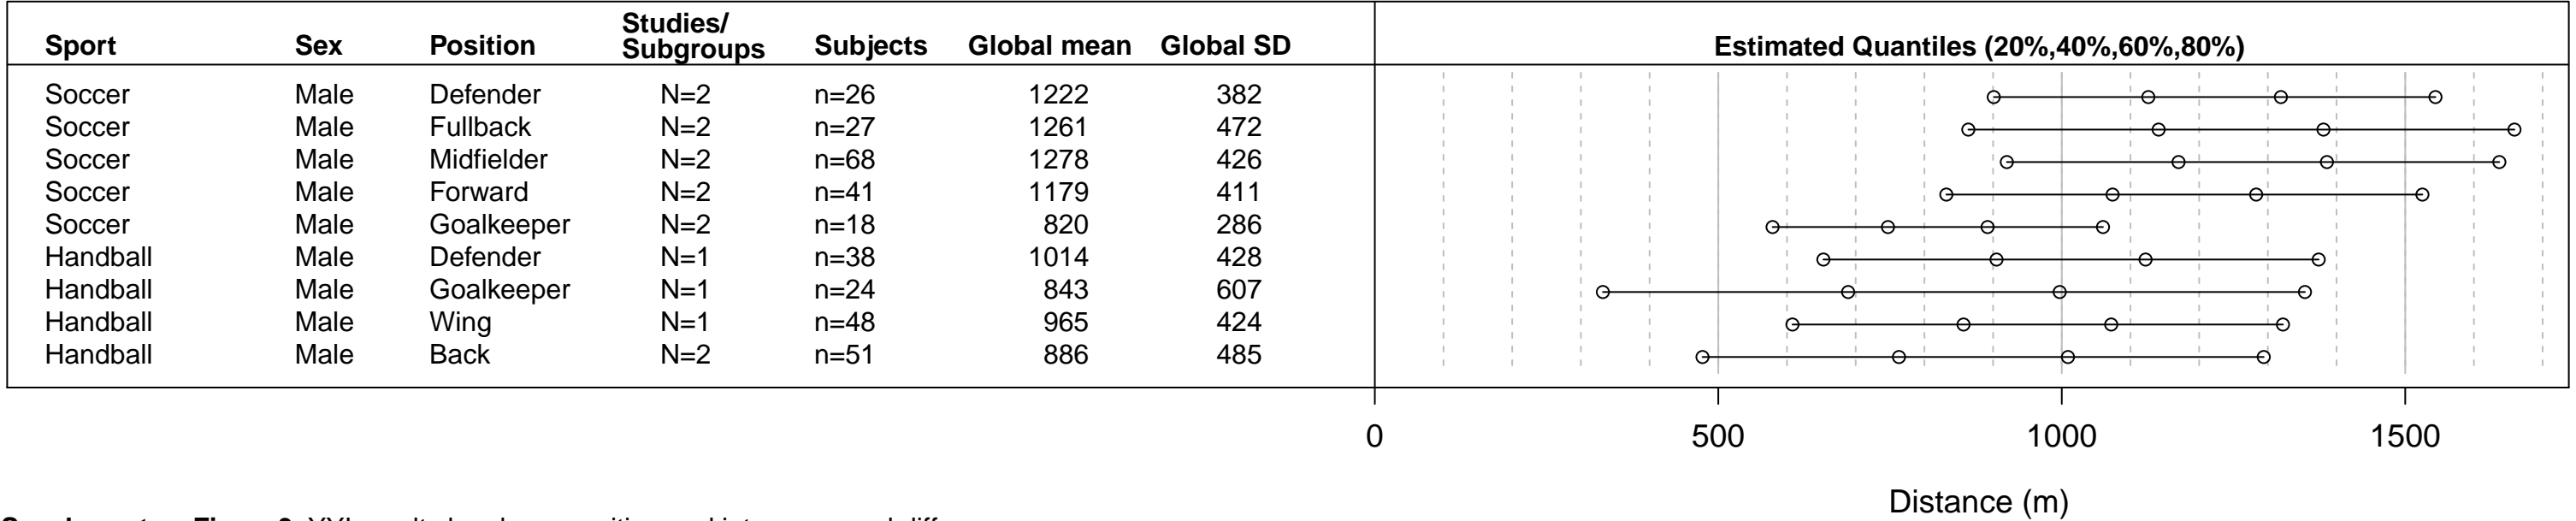

**Supplementary Figure 3:** YYI results by player position and intra-seasonal differences.
